# Supplementary material for: Long-Term Outcomes and Risk Factors of Renal Failure Requiring Dialysis after Heart Transplantation: A Nationwide Cohort Study
Source: PubMed Central journal article supplement (PMC7464655; doi:10.3390/jcm9082455), 2020-07-31
Supplement: jcm-09-02455-s001.pdf [file jcm-09-02455-s001.pdf]

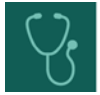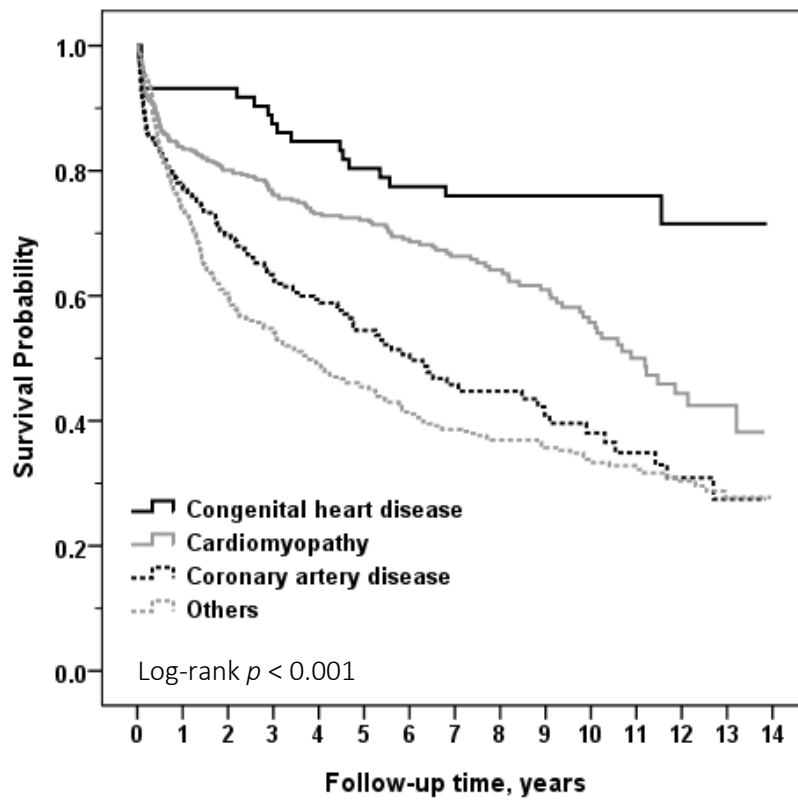

Figure S1. Comparison of long-term survival according to primary diagnosis for heart transplantation.

**Table S1.** Comparison of risk factors predicting early postoperative AKI between Taiwan National Cohort and published studies.

| Author (patient number)                                      | Wang ( <i>n</i> = 1129)             | Jokinen[14] ( <i>n</i> = 93)                                                                     | Boyle[18] ( <i>n</i> = 756)         | De Santo[42] ( <i>n</i> = 307)                                                | García-Gigorro[23] ( <i>n</i> = 310)                 | Gude[24] ( <i>n</i> = 585)                              | Fortrie[12] ( <i>n</i> = 531)    |
|--------------------------------------------------------------|-------------------------------------|--------------------------------------------------------------------------------------------------|-------------------------------------|-------------------------------------------------------------------------------|------------------------------------------------------|---------------------------------------------------------|----------------------------------|
| Year/Country                                                 | 2020/Taiwan                         | 2010/Finland                                                                                     | 2006/USA                            | 2011/Italy                                                                    | 2018/Spain                                           | 2010/Norway                                             | 2016/Netherlands                 |
| Research setting                                             | National cohort; retrospective      | Single center; retrospective                                                                     | Single center; retrospective        | Single center; retrospective                                                  | Single center; retrospective                         | Single center; retrospective                            | Single center; retrospective     |
| Age in years                                                 | 46 ± 17*                            | 49 ± 12*                                                                                         | 57 (50, 63)**                       | 32 ± 12*                                                                      | 53**                                                 | 50 ± 12*                                                | 51**                             |
| Male                                                         | 70%                                 | 70%                                                                                              | 80%                                 | 67%                                                                           | 80%                                                  | NA                                                      | 78%                              |
| Follow-up in years                                           | 5.0 ± 4.1*                          | Up to 1 year                                                                                     | Hospital stay                       | Hospital stay                                                                 | 6.7**                                                | 6.6 ± 5.5*                                              | Up to 1 year                     |
| Definition of AKI                                            | AKI-D                               | AKI-D                                                                                            | AKI-D                               | RIFLE-I/F (> 50% decrease in eGFR or AKI-D)                                   | KDIGO criteria: AKI stage 1-3                        | AKIN (> 50% increase in sCr or AKI-D)                   | KDIGO criteria: AKI stage 1-3    |
| AKI incidence                                                | 21%                                 | 25%                                                                                              | 6%                                  | 14%                                                                           | 40% (AKI-D: 10.3%)                                   | 25% (AKI-D: 12%)                                        | 76% (AKI-D: 5%)                  |
| Risk factors: pre-operative                                  | CKD<br>AKI<br>CAD                   | ARB use<br>Pacemaker<br>Time Intubation >24 hours<br>eGFR < 60 ml/min/1.73 m <sup>2</sup><br>PGD | High sCr<br>Insulin-requiring<br>DM | Previous heart operation                                                      | Logistic EuroSCORE                                   | Pre-operative cardiac output                            | BMI<br>DM<br>CKD stage by eGFR   |
| Risk factors: Peri- or post-operative                        | NA                                  | Re-admission to OR<br>Diuresis during surgery<br>Post-operative increase troponin T              | Cardiopulmonary bypass time         | Blood transfusion > 4 units<br>Elevated Troponin I<br>Length of ischemic time | Cardiac tamponade<br>Acute RV failure Major bleeding | Donor age<br>IV CsA<br>immediately post-operatively use | RV failure                       |
| Protective factors                                           | HBV<br>Statin use<br>Cardiomyopathy |                                                                                                  | Higher serum albumin                |                                                                               |                                                      |                                                         | Higher age,<br>Induction therapy |
| Follow-up in years                                           | 5.0 ± 4.1*                          | Up to 1 year                                                                                     | Hospital stay                       | Hospital stay                                                                 | 6.7**                                                | 6.6 ± 5.5*                                              | Up to 1 year                     |
| Short-term/intermediate survival impact of AKI <sup>  </sup> | In hospital ↓                       | NA                                                                                               | In hospital ↓                       | In hospital ↓<br>1-year ↓                                                     | In hospital ↓                                        | 3-month ↓                                               | 1-year ↓ (only in AKI-D)         |
| Long-term survival impact of AKI                             | NS for those who survived 3 months  | NA                                                                                               | NA                                  | NA                                                                            | NS <sup>††</sup>                                     | NS for those who survived 3 months                      | NA                               |

\*Values expressed as mean ± standard deviation; \*\*Values expressed as median (25th percentile, 75th percentile if data are available); <sup>||</sup> Compare with non-AKI cohort unless otherwise stated;

<sup>††</sup>Survival after discharge compared with patients with AKI but no RRT requirement. Abbreviations: AKI, acute kidney injury; AKI-D, acute kidney injury requiring dialysis; NA, not available;

---

RIFLE-I/F, RIFLE (Risk, Injury, Failure, Loss, and End-stage kidney disease) criteria-Injury or Failure; eGFR, estimated glomerular filtration rate; KDIGO, Kidney Disease: Improving Global Outcomes; AKIN, the Acute Kidney Injury Network; sCr, serum creatinine; CKD, chronic kidney disease; CAD, coronary artery disease; ARB, angiotensin receptor blocker; DM, diabetes mellitus; EuroSCORE, European System of Cardiac Operative Risk Evaluation; BMI, body mass index; PGD, Prolonged graft dysfunction; OR, operating room; RV, right ventricular; IV CsA, intravenous cyclosporine; HBV, hepatitis B virus; HCV, hepatitis C virus; AKI, acute kidney injury; MMF, Mycophenolate mofetil; NS, nonsignificant.
